# Supplementary material
Source: PubMed Central journal article supplement (PMC2902067)

**Supplemental Figure 1.** Serum CEA levels (% change from baseline) in patients with a best objective response (RECIST) of (a) partial response (n=3), (b) stable disease (n=12), and (c) progressive disease (n=3)

(a)

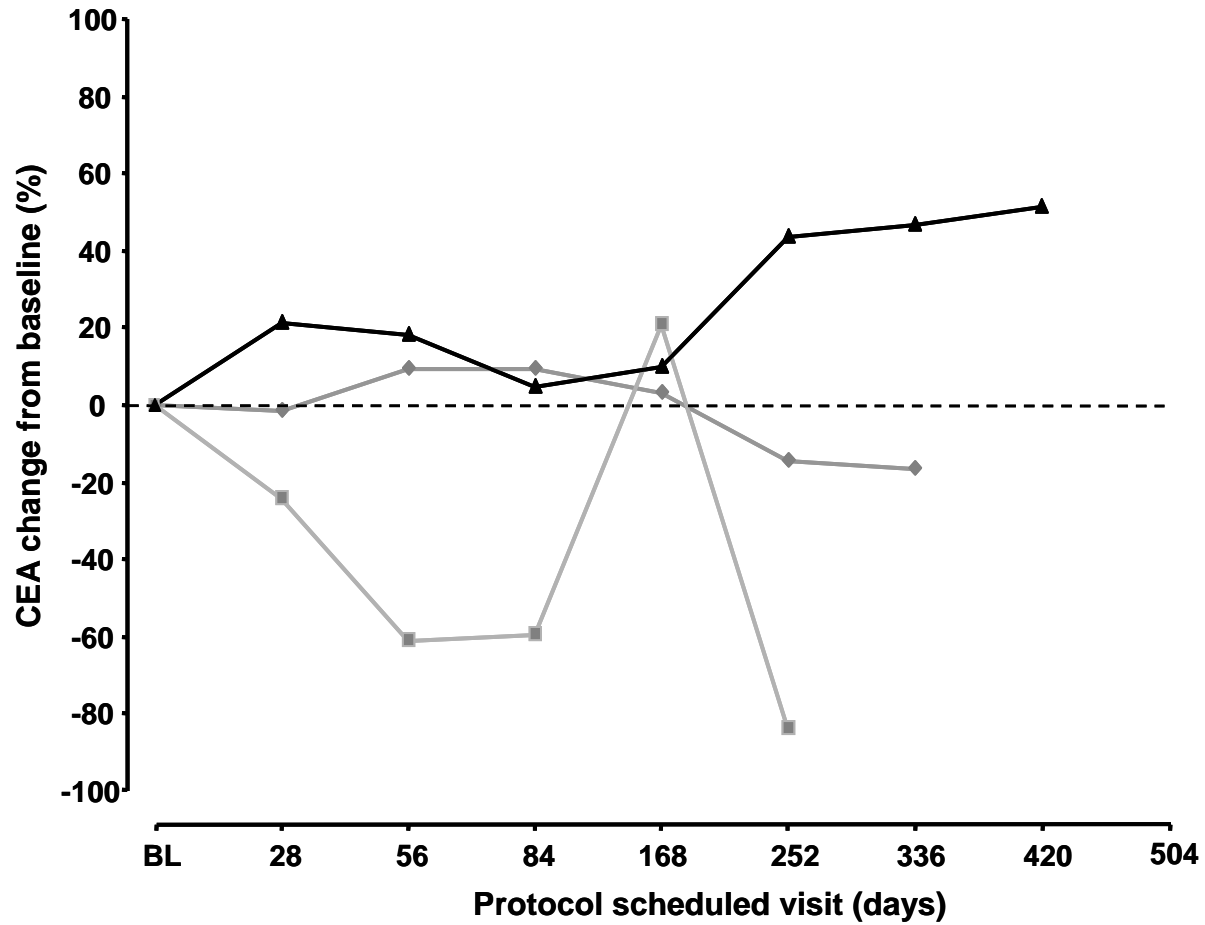



(c)

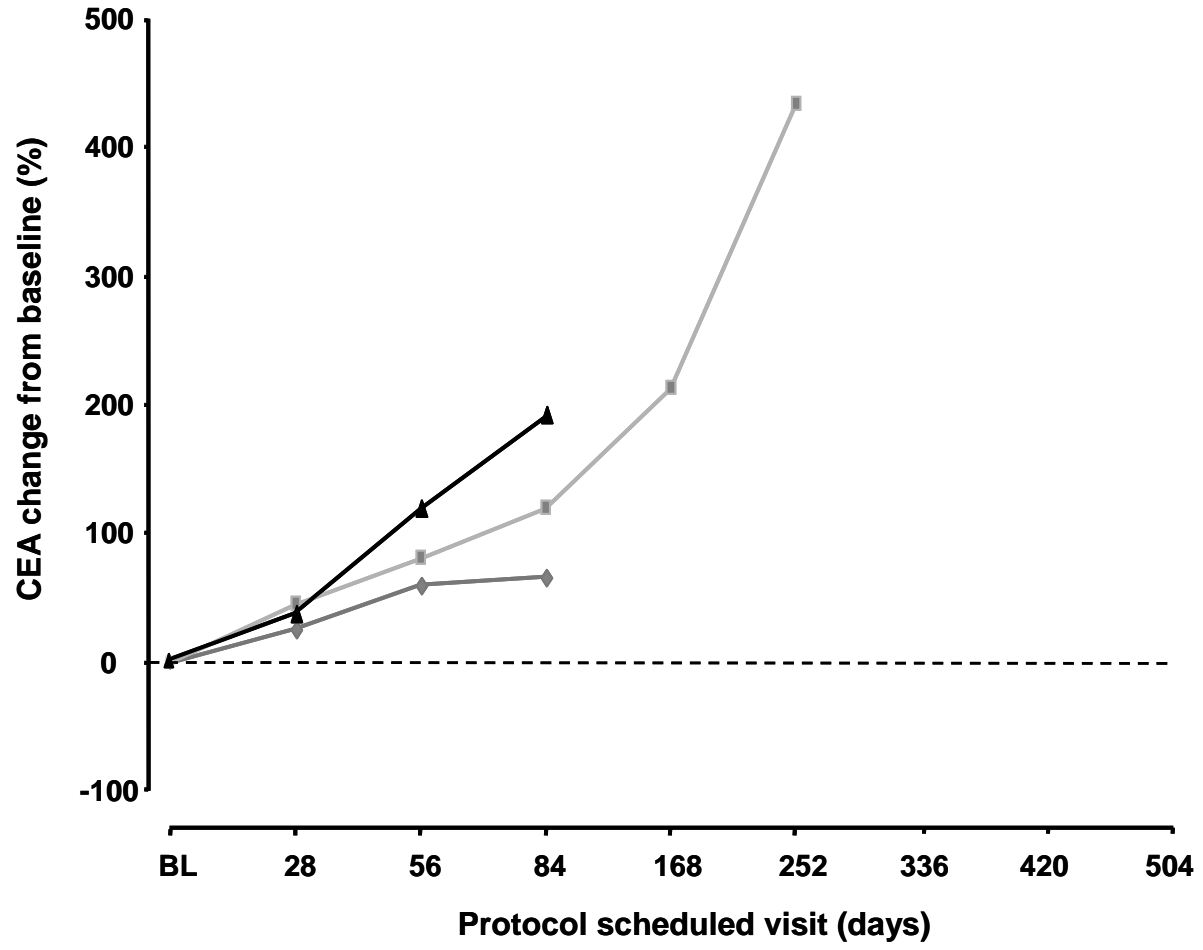

Supplement: jc.2009-2461_1.pdf [file jc.2009-2461_1.pdf]
